# Supplementary material
Source: PubMed Central journal article supplement (PMC6925330)
Supplement: NIHMS1542366-supplement-1.pdf [file NIHMS1542366-supplement-1.pdf]

eSupplement 1. Individual patient characteristics for children treated for unilateral cataract

| ID                | Age, years | Cataract type | Age at surgery, mos | Eye alignment, distance, near | Visual acuity, logMAR |            | Worth 4-Dot, pass or fail |
|-------------------|------------|---------------|---------------------|-------------------------------|-----------------------|------------|---------------------------|
|                   |            |               |                     |                               | Affected eye          | Fellow eye |                           |
| <b>Congenital</b> |            |               |                     |                               |                       |            |                           |
| C1                | 3.1        | Nuclear       | 1.2                 | Ortho, Ortho'                 | 0.5                   | 0.1        | Fail                      |
| C2                | 3.8        | Nuclear       | 1.0                 | ET18, ET25'                   | 0.4                   | 0.0        | Fail                      |
| C3                | 4.4        | Nuclear       | 1.0                 | Ortho, Ortho'                 | 0.3                   | 0.1        | Pass                      |
| C4                | 5.4        | Nuclear       | 0.3                 | Ortho, Ortho'                 | 0.4                   | 0.0        | Pass                      |
| C5                | 5.8        | Nuclear       | 5.6 <sup>b</sup>    | Ortho, Ortho'                 | 0.5                   | 0.0        | Fail                      |
| C6                | 6.1        | Nuclear       | 1.8                 | Small ET DVD <sup>c</sup>     | 0.3                   | 0.2        | Fail                      |
| C7                | 6.1        | Nuclear       | 1.8                 | Small ET HT <sup>c</sup>      | 0.5                   | 0.1        | Fail                      |
| C8                | 7.0        | Nuclear       | 0.7                 | X(T)10-15DVD, N/A             | 0.8                   | 0.1        | Fail                      |
| C9                | 10.7       | Nuclear       | 0.9                 | Small XT: N/A                 | 1.9                   | -0.1       | Fail                      |
| <b>Infantile</b>  |            |               |                     |                               |                       |            |                           |
| I1                | 5.5        | ASC           | 8.7                 | Ortho, Ortho'                 | 0.6                   | 0.1        | Fail                      |
| I2                | 5.6        | ASC           | 12.3                | X(T)18, X(T)14-16'            | 0.3                   | 0.1        | Pass                      |
| I3                | 4.7        | NS            | 9.0                 | X(T)12, E(T)10'               | 0.8                   | -0.1       | Fail                      |
| I4                | 3.9        | PL/PSC        | 15.8                | Ortho, Ortho'                 | 0.2                   | 0.3        | Pass                      |
| I5                | 4.1        | PL/PSC        | 11.5                | Ortho, Ortho'                 | 0.5                   | 0.0        | Pass                      |
| I6                | 4.5        | PL/PSC        | 15.3                | Ortho, Ortho'                 | 0.4                   | 0.1        | Pass                      |
| I7                | 5.1        | PL/PSC        | 21.6                | Ortho, Ortho'                 | 1.6                   | 0.0        | Fail                      |
| I8                | 7.2        | PL/PSC        | 12.4                | Ortho, Ortho'                 | 1.6                   | -0.1       | Fail                      |
| I9                | 7.4        | PL/PSC        | 19.4                | Ortho, Ortho'                 | 0.1                   | -0.1       | Pass                      |
| I10               | 7.9        | PL/PSC        | 16.5                | ET8, ET8'                     | 0.9                   | -0.1       | Pass                      |
| I11               | 11.5       | PL/PSC        | 6.4                 | DVD, moderate ET/HT'          | 1.2                   | 0.0        | Fail                      |
| I12               | 11.6       | PL/PSC        | 27.9                | Ortho, Ortho'                 | 0.4                   | 0.2        | Fail                      |
| I13               | 13.5       | PL/PSC        | 17.1                | Ortho, Ortho'                 | 0.6                   | -0.1       | Pass                      |
| I14               | 13.5       | PL/PSC        | 9.1                 | X(T)10, X(T)6'                | 1.4                   | 0.0        | Pass                      |

ASC, anterior subcapsular cataract; DVD, dissociated vertical deviation; ET, esotropia; HT, hypertropia; LogMAR, logarithm of the minimum angle of resolution; N/A, no information available; NS, nuclear sclerosis cataract; Nuclear, dense nuclear cataract; Ortho, orthotropia; PL/PSC, posterior lenticulus/posterior subcapsular cataract; X(T), intermittent exotropia.

<sup>a</sup>Nil stereoacuity was assigned an arbitrary number of 4.

<sup>b</sup>Dense cataract first noted by primary care physician at 4 mos; nuclear cataract with mild microphthalmia diagnosed by pediatric ophthalmologist at 5 mos.

<sup>c</sup>Not specified whether at distance or near.
